# Supplementary material for: Population structure, dispersion patterns and genetic diversity of two major invasive and commensal zoonotic disease hosts (Rattus norvegicus and Rattus tanezumi) from the southeastern coast of China
Source: Front Genet. 2024 Jan 8;14:1174584. doi: 10.3389/fgene.2023.1174584 (PMC10800861; doi:10.3389/fgene.2023.1174584)
Supplement: Supplementary file 1 [file Table1.XLSX]

## Sheet: Sheet1
Table S1. Microsatellite primers and mitochondrial detection primers
Species	Locus	Motif	Primer sequences 5’-3’	Amplicon size (bp)	PIC
Universal primers	Cox1		F:CCTACTCRGCCATTTTACCTATG
			R:ACTTCTGGGTGTCCAAAGAATCA
	CYTB		F:CGAAGCTTGATATGAAAAACCATCGTTG
			R:AACTGCAGTCATCTCCGGTTTACAAGAC
R. norvegicus	ratatpa2s	(GT)29GA(GT)3	F:AGTGTTGCGCTCCTATGCATAC	127	0.939
			R:AGAACATGCTGTTGTGAGGCTG
	ratcrbp21	(GT)24	F:TAACTTCCCTGAGCCTTGCTG	148	0.84
			R: CCACACTTCAAGTTCATTTTGTC
	ratcyp4al	(CA)24	F: CTCATAGAATAACGAAGCCACC	124	0.876
			R: AAACAGTCCATGAGATCAAAGTC
	ratfabplg	(GT)24	F:ATTTCTCATTGTGGTGCTATTG	128	0.839
			R: TCACATGTGTGAGACCTTGG
	ratglut	(CA)24	F: TGAAGGGTATGTTAGTGAGGAC	156	0.886
			R:TATCTGTGCAGTTGAGAATGTTG
	ratgtg3	(CA)20	F: GAATTGACCTTAGGTCAGCTGG	132	0.903
			R: GTGCTTTTCCTTGTTGGGTGAG
	rathpag	(GT)28(AT)5	F: CAACAGTACAGGAACACTGC	143	0.921
			R: GACGATTACATATGTATGTAGG
	ratmlvi2e	(GT)27	F:GTTAATATGGGTTTCTTCACCAC	183	0.775
			R: ATTATCCTCTTCTGACCTCAGC
	ratnkaalb	(CA)3TA(CA)25	F: AACCCAGTGGTAGCTTCCATCC	188	0.875
			R: TACTTGTCTCGTCCAACCTACAG
	HJS-ND4		F:TATTCTCCTCCGATCCATTATC
			R:CCATAACCCCCTAGCTTTAG
	HJS-D-LOOP		F:TCAGGACAATCAAGAAGAAGGA
			R:TGAGGGTAGGCAAGTAAAGAGG
R. tanezumi	Rt1	(AC)25	F:ATCGCTCAGTTGGTCAAG	346	0.824
			R:CCTGGCTGTGGATGTATT
	Rt2	(AC)23	F:AACCTTCACCAACAGAGATT	283	0.909
			R: GCTCATGTTCTTCCACCTA
	Rt3	(CA)18	F: AAACTGAGTTGACCCATCC	229	0.838
			R: AAAGGCATTTGCGATTGAG
	Rt4	(TATC)20	F:CAAGTAAGGTTAGGCAGAGA	339	0.849
			R: CACGGTTTACCACAGTCT
	Rt5	(CA)6(CATG)3(CA)21	F: TTCCTTCAAGTTGTCCTCTG	231	0.707
			R: TCGTATTCTCACTTCCTCAC
	Rt6	(AC)7AG(AC)28	F: AACCGTTATCAGCCACAA	259	0.888
			R: AGACAACCTCAGCTACCA
	Rt8	(AC)24	F: AGGTGTGGTGACTGTGTA	376	0.832
			R: TTCTTAGGTAGGCATGTGAG
	D3Cebr3		F:CAGGGAATGCAGAAGATACAG
			R: GCGGCTTTAGGACTCTGGAG
	D5Cebr1		F: AACCGCCTGTATTTCTATTTC
			R: GCCCAAGTTTGATCCTCAG
	D11Mgh5		F:CAGCTCTAATTCCAGAAAGGTTT
			R:GAATCGATTGACAGATGTCTGTG
	HXS-ND4		F:TTGAAGCCACTCTAATCC
			R:AGTTGGTTTGCCTCGTTG
	HXS-D-LOOP		F:CCACCATCAACACCCAAAG
			R:CATGCCTTGACGGCTATGTTG
